# Supplementary material for: Stable and Metastable Phase Equilibria Involving the Cu6Sn5 Intermetallic
Source: Springer Nature journal article supplement (doi:10.1007/s11664-021-09067-4), 2021-07-26
Supplement: MOESM1 [file 19393498]

Supplementary Material to

**Stable and metastable phase equilibria involving the  $\text{Cu}_6\text{Sn}_5$  intermetallic**

A. Leineweber\*, M. Löffler, S. Martin

Institute of Materials Science, TU Bergakademie Freiberg, 09599 Freiberg

\*corresponding author

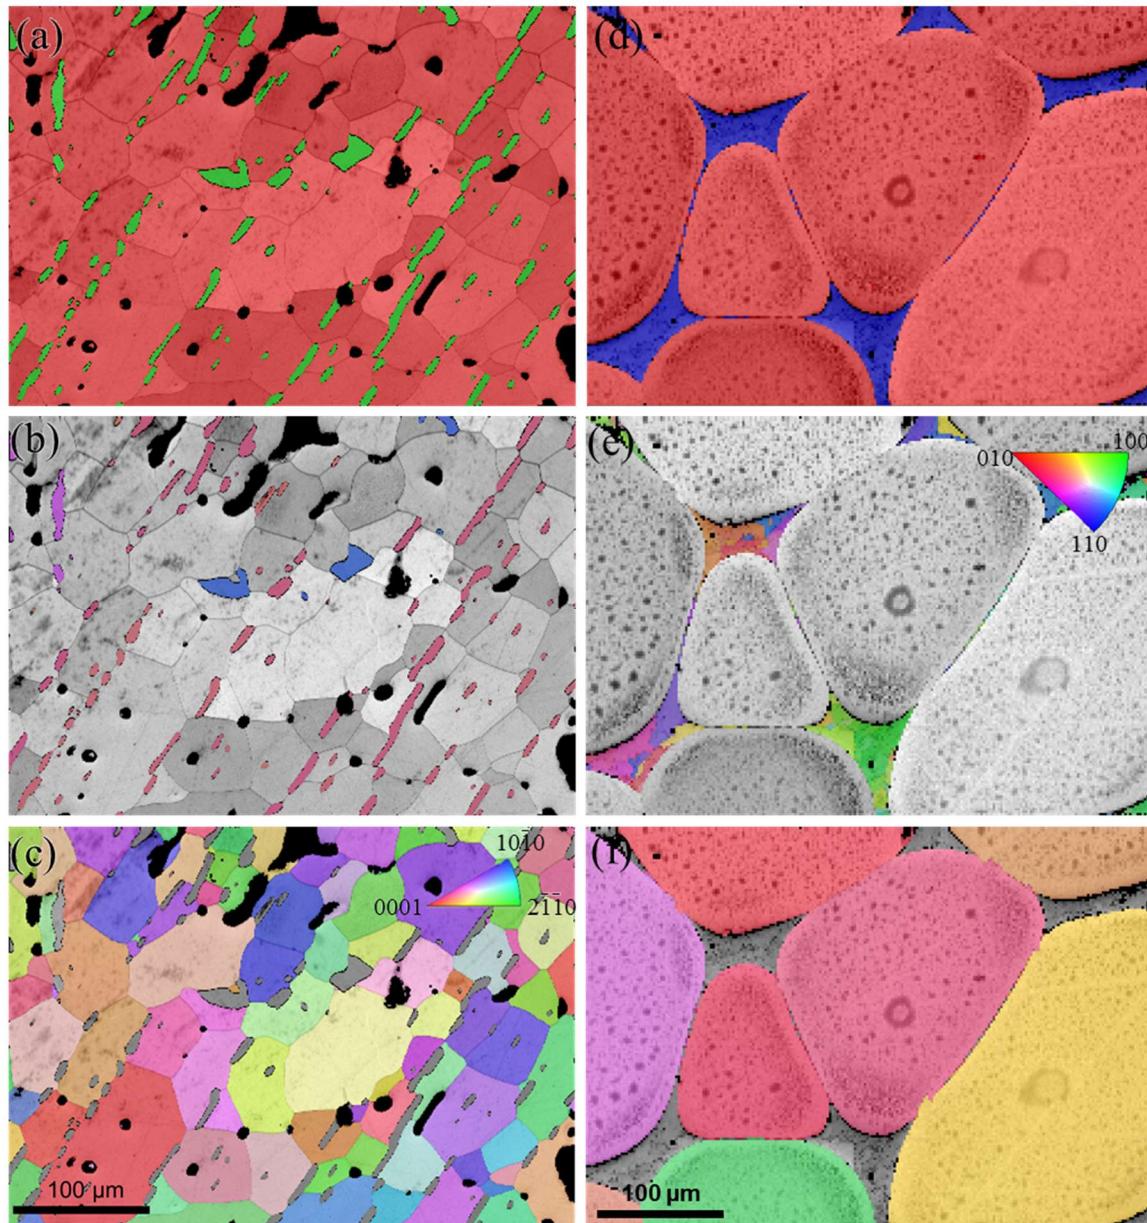

Figure S1 Electron backscatter diffraction maps of  $\text{Cu}_{57}\text{Sn}_{43}$  (left column, a, b, c) and  $\text{Cu}_{52}\text{Sn}_{48}$  (right column, d, e, f) after homogenization at 653 K for 120 h and quenching. Color is superposed by image quality in grey scale (dark: poor image quality). (a) and (d): phase map with red:  $\eta$ , green:  $\text{Cu}_3\text{Sn}$  and blue:  $\beta\text{-Sn}$ . (b) and (e): orientation maps for the respective minority phase. (c) and (f): orientation maps for the  $\eta$  majority phase. The color representation of the  $\eta$ -phase and  $\text{Cu}_3\text{Sn}$  in (b), (c) and (f) is given by the stereographic triangle in (c).

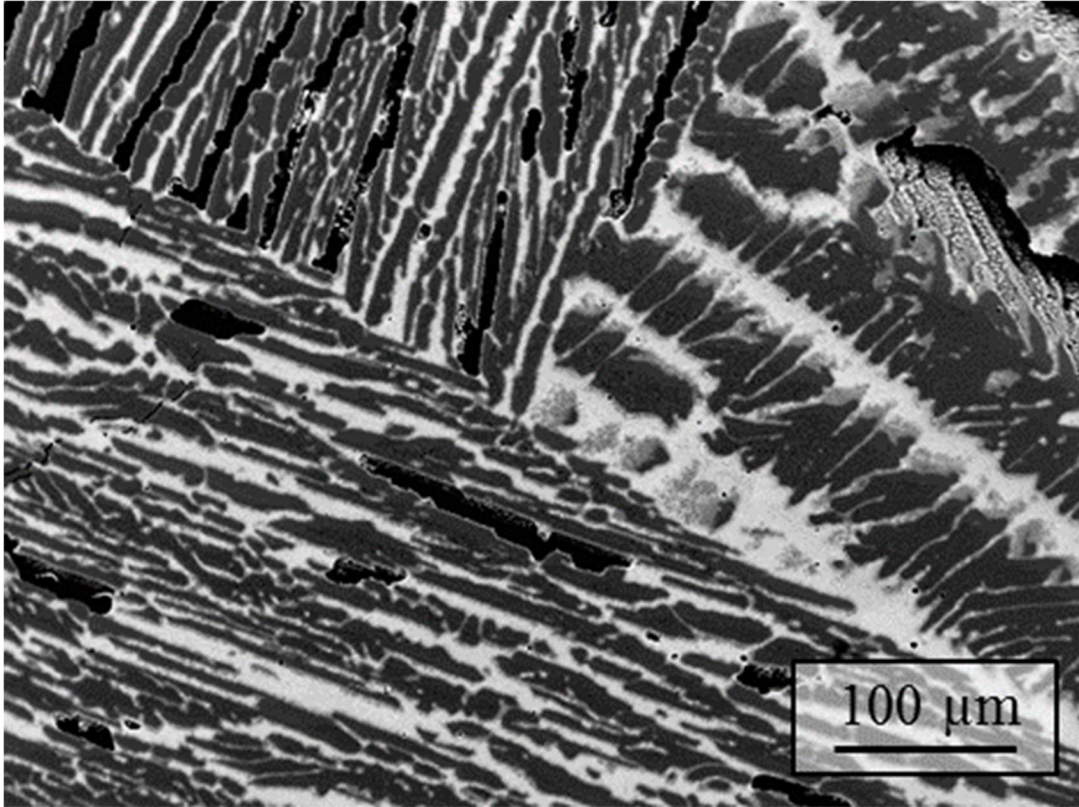

Figure S2 Scanning electron microscopy image taken with backscattered electrons from a polished cross-section of Cu<sub>57</sub>Sn<sub>43</sub> alloy obtained by quenching the melt from 1073 K. Dark primary Cu<sub>3</sub>Sn dendrites surrounded by medium dark Cu<sub>6</sub>Sn<sub>5</sub> (unspecified state of order) and light β-Sn rich regions. Note the porous regions in interdendritic space.
